# Validation of manifold-based direct control for a brain-to-body neural bypass

E. Losanno<sup>1</sup>, M. Badi<sup>2</sup>, E. Roussinova<sup>2</sup>, A. Bogaard<sup>3</sup>, M. Delacombaz<sup>3</sup>, S. Shokur<sup>2†</sup>, S. Micera<sup>1,2†\*</sup>

## Affiliations

<sup>1</sup> The Biorobotics Institute and Department of Excellence in Robotics and AI, Scuola Superiore Sant'Anna, 56025 Pisa, Italy

<sup>2</sup> Bertarelli Foundation Chair in Translational Neuroengineering, Center for Neuroprosthetics and Institute of Bioengineering, École Polytechnique Fédérale de Lausanne (EPFL), 1015 Lausanne, Switzerland

<sup>3</sup> Department of Neuroscience and Movement Sciences, Platform of Translational Neurosciences, Section of Medicine, Faculty of Sciences and Medicine, University of Fribourg, 1700 Fribourg, Switzerland

† Authors contributed equally to the work

\* corresponding author, [silvestro.micera@epfl.ch](mailto:silvestro.micera@epfl.ch) [[@santannapisa.it](mailto:@santannapisa.it)]

**Keywords:** brain-body interfaces, direct control, neural manifold, peripheral neurostimulation, hand movement control

## 24 **Abstract**

25

26 Brain-body interfaces (BBIs) are neuroprostheses that can restore the connection between brain  
27 activity and body movements. They have emerged as a radical solution for restoring voluntary hand  
28 control in people with upper-limb paralysis. The BBI module decoding motor commands to actuate  
29 the limb from brain signals should provide the user with intuitive, accurate, and stable control. Here,  
30 we present the design and demonstration in a monkey of a novel brain decoding strategy based on the  
31 direct coupling between the activity of intrinsic neural ensembles and output variables, meant to  
32 achieve ease of learning and long-term robustness. We identified once an intrinsic low-dimensional  
33 space (called manifold) capturing the co-variation patterns of the monkey's neural activity associated  
34 to reach-to-grasp movements. We then tested the animal's ability to directly control a computer cursor  
35 using cortical activation along the manifold axes and demonstrated rapid learning and stable high  
36 performance over 16 weeks of experiments. Finally, we showed that this brain decoding strategy can  
37 be effectively coupled to peripheral nerve stimulation to trigger hand movements. These results  
38 provide evidence that manifold-based direct control has promising characteristics for clinical  
39 applications of BBIs.

40

41

## 42 **Main Text**

43

### 44 **1. Introduction**

45

46 Brain-body Interfaces (BBIs) are neuroprostheses that allow users to voluntarily control the  
47 movement of their body through an artificial neural bypass. A survey of patients with tetraplegia due  
48 to spinal cord injury [1] showed that BBIs are the preferred solution compared to the control of  
49 external robotic devices characterizing classic brain-machine interfaces (BMIs) [2]. In BBIs, brain  
50 activity recorded from motor cortical areas using invasive [3]–[10] or non-invasive [11], [12]  
51 interfaces is translated into motion commands to actuate limbs via electrical stimulation of  
52 neuromuscular structures. Thus, BBIs need to tackle two complex neurotechnological modules, i.e.,  
53 a motor decoding module and a movement restoration module, and their integration [13].

54

55 Focusing on the restoration of hand function, an ideal BBI should effectively integrate an easy-to-  
56 learn, accurate, and stable brain decoding paradigm with a motor restoration module allowing the  
57 selective control of the hand. Recently, we demonstrated in a preclinical study in monkeys that  
58 peripheral nerve stimulation (PNS) at the intrafascicular level can evoke multiple grasps and hand  
59 extension movements with only two nerve implants [14], thus complying with the requirement of  
60 movement selectivity. Here, we present a brain decoding module based on the direct linear coupling  
61 between intrinsic neural ensemble dynamics and motion commands, which satisfies the  
62 characteristics of ease of learning and temporal stability. We next validate a full BBI integrating this  
63 brain decoding approach with intrafascicular PNS to trigger hand movements.

64

65 To design our brain decoding strategy, we built on recent studies [15]–[17] showing that neural  
66 population dynamics is constrained by the brain circuitry in a low-dimensional space, i.e., the neural  
67 manifold, spanned by the so-called neural modes, and that learning a new task is facilitated when the  
68 underlying neural activity pattern lies within this intrinsic manifold [17]. We hypothesized that by  
69 directly linking the activation of intrinsic neural modes to the controlled variables, the subject could  
70 learn to modulate this activation in such a manner that reduces the need for frequent calibration. Thus,

71 we extended the previously validated approach of direct control based on the voluntary modulation  
72 of single-neuron activity aided by biofeedback [3] to the use of intrinsic neural ensemble dynamics.

73  
74 We examined the performance of the manifold-based direct control strategy in a macaque monkey.  
75 Specifically, we computed once a 2D manifold capturing a significant portion of the variance of the  
76 animal's neural activity while performing a behavioral grasping task. We then coupled the activation  
77 of the two fixed neural modes to the 2D movement of a cursor and tested this BMI paradigm in a  
78 point-to-point task with incremental variations over weeks. This BMI phase was used to evaluate the  
79 intuitiveness and long-term performance of our decoding strategy. We show that the monkey could  
80 succeed rapidly and robustly over time. Finally, we additionally coupled the dynamics of the two  
81 neural modes to the amplitude of stimuli delivered by intrafascicular electrodes implanted in the  
82 animal's arm nerves. We demonstrate that our decoding strategy can be integrated with intrafascicular  
83 PNS into a BBI to grade hand movements.

84

85

## 86 **2. Results**

87

88 We tested a manifold-based direct control paradigm to control two degrees of freedom (DoFs) in a  
89 macaque monkey implanted with a 48-channel intracortical array in the hand region of primary motor  
90 cortex (M1). We distinguish three phases of the experimental protocol: (i) a calibration phase, in  
91 which the 2D neural manifold was identified, (ii) a BMI phase, in which the monkey used the  
92 activation of the neural modes spanning the manifold found in (i) to directly control a cursor on a  
93 screen, and (iii) a BBI phase in which the monkey used the same manifold-based direct control  
94 strategy to actuate the hand via intrafascicular PNS.

95

### 96 **2.1. Calibration of a 2D brain control space based on motor neural modes**

97

98 We identified an intrinsic 2D neural manifold associated with a hand motor task as the brain control  
99 space for direct control of 2 DoF cursor and hand movements. During the calibration session, we  
100 recorded M1 activity of the monkey while performing center-out reaching and grasping of objects  
101 mounted on a robotic arm [18] (**Figure 1A**). Using principal component analysis (PCA) [15], we  
102 derived the three main neural modes, representing the directions of highest variance (13%, 8%, and  
103 5%, respectively) of the recorded M1 activity. We then examined the dynamics of the three neural  
104 modes, i.e., the so-called latent variables [15], during the motor task, to select the two control signals  
105 for the subsequent direct control experiments. We relied on the hypothesis that the two intrinsically  
106 most modulated latent variables would provide a larger working range when directly coupled to  
107 output commands. A higher modulation depth was observed for the second (mean $\pm$ std across trials  
108 equal to 179 $\pm$ 45 a.u.) and third (115 $\pm$ 30 a.u.) latent variables with respect to the first (69 $\pm$ 29 a.u.).  
109 Thus, we selected the 2D manifold defined by the second and third neural modes as the brain control  
110 space. The matrix mapping M1 activity into the 2D manifold was kept fixed for the rest of the  
111 experimental protocol and no other calibration session was performed.

112

### 113 **2.2. BMI with manifold-based direct control**

114

115 Next, we tested the effectiveness and robustness of a 2D BMI with manifold-based direct control over  
116 38 sessions (spanned over 113 days, **Supp. Table 1**). The monkey controlled a cursor on a screen  
117 through its M1 activity mapped into the 2D manifold (**Figure 1B**). The second and third latent  
118 variables, hereafter referred to as  $L_y$  and  $L_x$ , were proportionally converted into the vertical (y) and

119 horizontal (x) coordinates of the cursor, respectively. We designed a delayed point-to-point cursor  
120 control task: the animal had to first keep the cursor in a baseline position for 0.5 s and then reach and  
121 hold a target location for 0.1 s. Trial timeout was set to 8 s and successful trials were rewarded with  
122 liquid food. We employed an incremental training paradigm [19]: the number of DoFs to be controlled  
123 and the reaching space were progressively changed during the protocol (**Figure 1C**). For the first 10  
124 sessions, only the y-coordinate of the cursor was brain-controlled with targets placed vertically with  
125 respect to the baseline position (cyan in **Figure 1C**): during these sessions the x-coordinate was set  
126 to 0. Next, and for the rest of the protocol, we allowed the monkey to control the cursor both in the x  
127 and y directions and we varied the location of the target: on session 11 we only presented vertical  
128 targets (blue), on sessions 12 to 15 the targets were placed diagonally to the baseline position (purple),  
129 and on sessions 16 to 20, horizontally (red). Finally, between sessions 21 and 38, the targets were  
130 randomly alternated (gray).

131  
132 The monkey was able to effectively modulate its latent neural activity to perform the different tasks  
133 (**Figure 2A**). Importantly, the control was possible without using hand muscle contractions (**Supp.**  
134 **Figure 1**). The performance was high since day 1 of the first control configuration (1 DoF, vertical  
135 target), with 82% successful trials (**Figure 2B**) which were executed in a median time of 2.41 s  
136 (**Figure 2C**), and 21% first attempt successes (defined as the trials in which the cursor was held at  
137 the baseline and target positions for the required timespans on the first time these positions were  
138 reached) (**Supp. Figure 2A**). Over the next sessions with this configuration, we observed, despite  
139 some dips, an overall increase in success rate up to 90% on session 10 (**Figure 2B**), a significant  
140 decrease in execution time ( $p < 0.001$ , F-test; **Figure 2C**), and a significant increase in the percentage  
141 of trials completed on the first attempt ( $p < 0.01$ , F-test; **Supp. Figure 2A**), indicating that with  
142 practice the animal learned to perform the task more efficiently. After the introduction of the  
143 horizontal DoF, the accomplishment of the vertical target task was slightly compromised and the  
144 success rate decreased to 84% (session 11; **Figure 2B**). Another difficulty was encountered when the  
145 monkey had to jointly modulate the two latent variables. Indeed, we observed a further drop in the  
146 success rate on session 12 when the diagonal target was introduced (80% successes; **Figure 2B**).  
147 However, with training, the percentage of successful trials gradually increased, reaching 90% (session  
148 15; **Figure 2B**) as it was reached at the end of the 1 DoF vertical task phase. Meanwhile, the execution  
149 time declined significantly ( $p < 0.01$ , F-test) until a median value of 1.27 s (session 15; **Figure 2C**).  
150 When on session 16 we introduced the horizontal target, the success rate decreased to 84% (**Figure**  
151 **2B**) and both the execution time (median of 2.33 s; **Figure 2C**) and the percentage of trials completed  
152 on the first attempt (25%, **Supp. Figure 2A**) returned to values close to those on the first days of the  
153 protocol. Nevertheless, over time, we observed an improvement in all these performance measures  
154 (**Figure 2B-C**, **Supp. Figure 2A**). After gradually adapting to the different tasks, the monkey was  
155 able to effectively switch between them. Indeed, when on session 21 we started to alternate different  
156 targets, she succeeded in 94% of the trials (**Figure 2B**) in a median time of 1.45 s (**Figure 2C**). The  
157 performance remained quite stable until session 38 (90% successes, **Figure 2B**; median execution  
158 time of 1.61 s, **Figure 2C**), corresponding to 113 days after the calibration of the control space (**Supp.**  
159 **Table 1**). This performance plateau possibly reflects the saturation of both the animal's  
160 neuromodulation ability and motivation.

161  
162 For the 2 DoF control configurations, we measured the movement error, i.e., the average deviation of  
163 the cursor path from the ideal straight trajectory between the baseline and target positions. Because  
164 we did not impose the path to reach the target, the monkey often succeeded in the task by exploiting  
165 curved trajectories due to the activation of both  $L_x$  and  $L_y$  for all the target types. The movement

166 error decreased slightly over time for the horizontal target and stagnated over the multiple-target  
167 sessions (**Supp. Figure 2B**), the monkey having reached a stable success rate and execution time.

168

### 169 **2.3. Neural tuning strategies**

170

171 During the extended timespan of the cursor control experiment, we observed day-to-day neural  
172 recording instabilities, in agreement with previous studies [20]–[22]. Indeed, the average firing rate  
173 of M1 channels in the baseline condition (**Supp. Figure 3A**) and the corresponding latent neural  
174 activity (**Supp. Figure 3B**) varied across sessions. We thus investigated whether, following these  
175 instabilities, the animal changed its neural tuning strategy to perform the different tasks. In particular,  
176 we analyzed the inter-session variability of M1 channels preferential tuning, as measured by  
177 normalized modulation depth (see Materials and Methods), for the three targets within and between  
178 two phases of the experimental protocol, i.e., when the target of interest was the only one presented,  
179 and when it was alternated with the other targets. As expected, we observed some levels of variability  
180 in channel-wise modulation across sessions within the same protocol phase (median of 0.76, 1.07,  
181 0.62 a.u. in the single-task phase and of 0.80, 0.81, 0.74 a.u. in the multi-task phase for the vertical,  
182 diagonal, and horizontal targets, respectively; **Figure 3A**). Interestingly, the variation between  
183 sessions of the single and multi-task phases was higher than the variation across sessions within the  
184 same phase for all the three targets (median of 1.32, 1.30, 0.78 a.u.; **Figure 3A**) and to a greater extent  
185 for the vertical and diagonal targets. This suggests that the circumstances of the task contributed  
186 significantly to the changes in neural tuning. We next analyzed the average neural tuning strategy at  
187 the single channel level in each protocol phase (**Figure 3B**) and focused on the most modulated  
188 channels (**Supp. Figure 3C**). We can see that during 1D control with only vertical targets, the monkey  
189 preferentially modulated channels #3, 13, 16, 20, and 22, all of which had a positive weight on  $L_y$ .  
190 When the horizontal DoF was introduced, channel #20 was abandoned, likely because of its similar  
191 positive contribution to both neural modes. Moreover, the animal started to tune channel #29,  
192 associated with a positive weight on  $L_y$  and a slightly negative weight on  $L_x$ , and, interestingly,  
193 channel #27, associated with a much higher weight on  $L_x$  than on  $L_y$ , likely to counteract the strong  
194 negative effect of channel #22 on  $L_x$  and thus keep the horizontal displacement at zero. The diagonal  
195 target in the single task phase was attained by favorably tuning channels #3 and 13, which had a more  
196 positive impact on  $L_y$  than on  $L_x$ , and channel #20. When introduced, the horizontal target was  
197 reached by mostly modulating channels #25 and 27, which had a much higher weight on  $L_x$  than on  
198  $L_y$ , and channel #20. These three channels were maintained in the multi-task phase of the protocol  
199 for the horizontal and diagonal targets, with slightly different ratios between each other, accompanied  
200 by channel #10, associated with a similar low positive weight on both neural modes. Channels #10,  
201 20 and 27 were also among the most modulated to reach the vertical target in the multi-task phase,  
202 together with channels #22 and 29, which had a positive weight on  $L_y$  and a negative weight on  $L_x$   
203 and thus were used to neutralize the movement of the cursor along x. This strategy probably proved  
204 to be the most efficient for the animal to switch between tasks. All together these results indicate that  
205 the monkey adapted its neural tuning over time led by a combination of changes in neural recordings  
206 and experimental conditions.

207

### 208 **2.4. BBI with manifold-based direct control**

209

210 Finally, we investigated the feasibility of using our direct manifold-based brain control paradigm to  
211 drive a neuroprosthesis based on intrafascicular PNS and grade hand movements. For this experiment,  
212 the animal was implanted with two customized intrafascicular electrodes (Mk-TIMES) [14], one in

213 the median nerve and one in the radial nerve, to trigger the opening and closing of the hand,  
214 respectively. We designed the BBI experiment as follows. While the monkey performed the cursor  
215 control task with vertical and/or horizontal targets, the latent variables  $L_x$  and  $L_y$ , once over a  
216 threshold, linearly modulated the amplitude of the stimuli applied to the median and radial nerve,  
217 respectively (**Figure 1B**), either jointly or independently (**Supp. Table 2**). Through a short calibration  
218 phase at the beginning of the experimental session, we set the saturation level and threshold for  
219 stimulation of the driving latent variable/s (**Supp. Figure 4A**). This latter value was regulated to  
220 reduce target-unspecific stimuli due to the frequent coactivation of  $L_x$  and  $L_y$ , and at the same time  
221 span a large range of neuromodulation. The calibration also served to determine the functional  
222 amplitude range for the selected Mk-TIME channels (**Supp. Figure 4B**). After setting the control  
223 parameters, we tested the BBI in grading the two target motor functions, i.e., hand opening and  
224 closing. The full BBI protocol is described in **Figure 4A**. M1 activity was processed in real-time to  
225 extract spike events and compute the channels firing rate. Stimulation-induced artifacts were then  
226 removed by subtracting the firing rate of a channel that responded only when stimuli were applied.  
227 Noise-free spike rates were projected into the 2D manifold to derive the activation of the two latent  
228 variables. After being smoothed,  $L_x$  and  $L_y$  were linearly transformed into cursor coordinates and, in  
229 addition, the leading latent variables of the session, if over the threshold, were converted into  
230 amplitude of stimulation. Charge-balanced pulses with the defined intensity were finally applied to  
231 the nerve at a frequency of 50 Hz. The overall decoding procedure induced a time delay of  
232 approximately 10 ms. We repeated this experiment over 6 sessions.

233  
234  $L_x$ -driven median nerve stimulation effectively activated the hand flexors to smoothly close the hand  
235 and modulate grip force when the animal accomplished the horizontal target task (**Figure 4B** left).  
236 Conversely,  $L_y$ -driven radial nerve stimulation recruited the hand extensors to incrementally open  
237 the hand and grade wrist extension force during the vertical target successes (**Figure 4B** right). In the  
238 two sessions in which the same type of stimulation (i.e., median, or radial) was enabled for both  
239 targets (**Supp. Table 2**), we quantified the target specificity of the BBI. In 27% of the successful  
240 trials on session 43,  $L_x$  exceeded the stimulation threshold during the vertical target task, inducing  
241 spurious median nerve stimuli and hand flexor responses (**Figure 4C** left). Similarly, in 29% of the  
242 successes on session 44,  $L_y$  exceeded the threshold during the horizontal target task, undesirably  
243 triggering the radial nerve and the hand extensors (**Figure 4C** right). Thus stimulation was not  
244 selectively activated in the majority of the cases, even though the undesired motor responses had a  
245 minor strength compared to those desired (**Figure 4C**).

246  
247 We next controlled if PNS perturbed the brain cursor control task. Considering all six sessions, we  
248 did not observe a significant decrease in either the success rate ( $p=0.38$ , Wilcoxon signed-rank test)  
249 nor the percentage of trials completed on the first attempt ( $p=0.25$ , Wilcoxon signed-rank test)  
250 compared with the PNS-free setting (**Figure 4D**), confirming the efficacy of our procedure for  
251 stimulation artifacts removal.

252  
253

### 254 **3. Discussion**

255

256 We assessed the performance of a 2-DoF brain control strategy confined within a fixed intrinsic motor  
257 manifold [15] for novel BBI restoring hand movements. We employed a simple yet intuitive brain  
258 decoding module based on a direct linear coupling between latent neural dynamics and output  
259 commands.

260

261 First, we assessed the within-manifold neuromodulation ability of the monkey in a 2D delayed point-  
262 to-point cursor control task. This BMI paradigm provided us with the flexibility necessary to study  
263 the long term temporal and task-related effects on the decoder performance. Our brain control strategy  
264 proved to be easy-to-learn and robust over 16 weeks. The animal showed a high success rate from  
265 the first day of the experiment without prior training and adapted readily to new tasks. We did observe  
266 small drops in proficiency when a change in neuromodulation strategy was required, but these were  
267 easily compensated for with little practice. Compared to previous studies in which monkeys were  
268 exposed to 2D cursor control based on a fixed linear decoder applied to a stable ensemble of neurons  
269 [23], [24], learning was more rapid. This result was certainly favored by the incremental design of  
270 the training protocol [19], but is also likely due to the “ecological” BMI mapping employed. By fixing  
271 the control space within an intrinsic manifold, we exploited natural (i.e., already acquired) neural  
272 activity patterns [17], and by intuitively relating the cursor movement to these patterns, we facilitated  
273 learnability. The monkey was then able to consistently switch between the different tasks,  
274 maintaining a success rate of ~90% until the end of the protocol (113 days after the control space  
275 calibration, **Supp. Table 1**). This long-term robustness is a promising result, as neural recording  
276 instabilities in chronic settings constitute one of the main challenges for the clinical translation of  
277 BMIs [20]–[22]. Standard BMIs based on algorithms to decode movement-related parameters from  
278 neuronal population activity require ad-hoc unsupervised decoder-updating methods [25]–[28] to  
279 account for day-to-day changes in neural recordings and avoid the frequent collection of calibration  
280 data. On the other hand, decoders that rely on stable single neurons [3] or stable neuronal ensembles  
281 [23] have limited temporal applicability because the isolation of the same cells is disrupted by neural  
282 turnover, which happens after a period of days to weeks [23]. Here, as expected, we did observe  
283 changes in neural recordings over the study period. However, the monkey was able to adjust the  
284 tuning of neural ensembles, also depending on the experimental conditions, to consolidate its skills  
285 in the different tasks and preserve a high success rate over several weeks. We believe that this  
286 effortless adaptation is still due to the inherence of manifold-based control. These results expand  
287 previous findings on the potential and utility of neural plasticity for BMI applications [23], [24].  
288

289 As a final step, we conducted a pilot experiment to test our direct manifold-based control strategy in  
290 driving a PNS-based neuroprosthesis for grading hand opening and closing. By training the monkey  
291 to timely up-regulate latent neural activity that linearly modulated the amplitude of intrafascicular  
292 PNS, our approach enabled the timely triggering of smoothed hand movements. Importantly,  
293 although it certainly elicited sensory percepts [29], the stimulation of healthy nerves did not impair  
294 performance in cursor control. These proof-of-concept results demonstrate the feasibility of  
295 integrating our decoding paradigm into a BBI.  
296

297 A limitation of our approach was the limited accuracy in effector control. The monkey frequently  
298 reached the visual target along curved cursor paths due to activation of both latent variables. This led,  
299 in the BBI phase, to the target-unspecific application of stimuli to the median and radial nerves,  
300 resulting in weaker but frequent undesired muscle responses. Our training paradigm, which was based  
301 on a simple point-to-point cursor control task and was lacking of instructions that encouraged straight  
302 cursor trajectories, certainly did not favor accuracy. In view of applying this control strategy to motor  
303 functions that require the coordinated recruitment of hand flexors and extensors, a more constrained  
304 task, such as an instructed-path [30] or a pursuit-tracking [31] task, should be used in the future to  
305 promote independent and finer control of the latent variables. This scenario would also be crucial to  
306 investigate whether our proposed decoder can achieve the level of control accuracy and smoothness  
307 provided by state-of-the-art algorithms such as the Kalmar filter [32], [33]. Moreover, while we have

308 limited our BBI paradigm to the control of two motor DoFs, necessitating only two driving latent  
309 variables, extending it to more complex movements will require additional control signals. In this  
310 framework, it will become increasingly critical to ensure the decoupling of latent neural dynamics to  
311 separately control multiple stimulation channels targeting specific muscles or muscle synergies. We  
312 thus note that a crucial aspect that should be investigated to corroborate the clinical utility of this  
313 approach would be to determine the degree of dominance and independence that can be achieved on  
314 multiple neural modes. Finally, further validation with a larger number of monkeys is necessary to  
315 generalize our results.

316  
317 In the perspective of clinical translation to people with severe motor disabilities, some practical points  
318 need to be discussed. First, the efficacy of a manifold identification method based on imagined or  
319 attempted movements has yet to be validated. However, since M1 was shown to be amply engaged  
320 not only in overt movements but also in cognitive motor processes [34], we believe that goal-directed  
321 motor imagery or motor attempt would be effective calibration paradigms, as usual in BMI and BBI  
322 clinical applications [35]. We also point out that brain areas such as premotor or parietal cortices  
323 could provide an interesting alternative or complement to M1 to derive intrinsic low-dimensional  
324 spaces associated with motor control [15], [36]. Second, the choice of the calibration tasks may be  
325 critical for the ease-of-learning of the BBI. Here, the neural manifold was identified based on a center-  
326 out reaching movement which was structurally related to the point-to-point cursor motion. Although  
327 experimental verification of this point is lacking, our recommendation would be to select calibration  
328 tasks that are congruent with the final BBI task. In the same line, we note that a larger repertoire of  
329 calibration movements may be necessary to provide the user with greater versatility for more complex  
330 control. Third, while this approach is more directly applicable to patients suffering from motor  
331 disorders that do not affect the cerebral cortex, such as spinal cord injury or brainstem stroke, neural  
332 tuning adaptability after cortical injuries remains to be tested. Since it was shown that cortical stroke  
333 survivors can learn to modulate ipsilesional cortical rhythms [37], we believe that control of latent  
334 neural dynamics is also possible, and could be enhanced by brain stimulation [37]. Moreover, studies  
335 have shown that BBIs can promote neurological recovery [37]–[42] thanks to the contingent link  
336 between brain activity and body mobilization which triggers Hebbian-like plasticity [43]. Therefore,  
337 we believe that our BBI would act like a reinforcing loop that simultaneously exploits and promotes  
338 neural plasticity.

339  
340 We conclude that direct control based on latent neural dynamics is a promising paradigm for BBI  
341 control in clinical applications because of its reliability and long-term stability, resulting from the  
342 inherence of neural manifolds and the intuitiveness of direct control links.

343

344

## 345 **4. Materials and Methods**

346

### 347 **4.1. Animal and implants**

348

349 The experiments were conducted on an adult female *Macaca fascicularis* monkey (5 years old, 3.1  
350 kg). The experimental protocol was elaborated in compliance with the national law on animal  
351 protection and approved by the Federal and local veterinary authorities (authorization number  
352 2017\_03\_FR).

353

354 During a first surgical intervention, the monkey received the implantation of three 48-channel  
355 microelectrode arrays (Blackrock Microsystems, USA, 400  $\mu\text{m}$  pitch, 1.5 mm tip length). One array



356 was implanted in the hand region of the M1 of the right hemisphere. Primary somatosensory and  
357 premotor cortices were also implanted but not analyzed in this study. Almost 6 months later (**Supp.**  
358 **Table 1**), the animal underwent a second surgery. Two custom-made chronic intrafascicular  
359 multichannel electrodes (TIMEs) tailored to the monkey anatomy (Mk-TIMEs) [14] were inserted  
360 into the animal's median and radial nerves, which innervate most of the flexor and extensor muscles  
361 of the hand, respectively [14]. The median Mk-TIME was implanted ~2 cm proximally to the elbow  
362 and the radial Mk-TIME ~2 cm proximally to the epicondyle along the humeral bone. In addition, to  
363 record EMG activity, the monkey was chronically implanted with 8 pairs of Teflon-coated stainless  
364 steel wires in the following flexor and extensor muscles of the hand: flexor carpi radialis (FCR),  
365 palmaris longus (PL), flexor digitorum profundus (FDP), flexor digitorum superficialis (FDS),  
366 extensor carpi radialis (ECR), extensor digitorum communis (EDC), extensor carpi ulnaris (ECU)  
367 and abductor pollicis longus (APL). The two surgeries were performed under aseptic conditions and  
368 general anesthesia induced with midazolam (0.1 mg/kg), methadone (0.2 mg/kg), and ketamine (10  
369 mg/kg) and maintained under continuous intravenous infusion of propofol (5 ml/kg/h) and fentanyl  
370 (0.2-1.7 ml/kg/h).

371

## 372 **4.2. Experimental setup and procedure**

373

### 374 *4.2.1. Behavioral reach-and-grasp task*

375

376 The monkey was trained to perform a center-out reach-and-grasp task, which is detailed in [18].  
377 Briefly, a robotic arm (Intelligent Industrial Work Assistant, IIWA – KUKA, Augsburg, Germany)  
378 with seven degrees of freedom, presented custom-molded, silicone objects of various shapes  
379 (cylindrical, spherical and small triangular) in front of the animal at different locations in space. The  
380 monkey was trained to freely reach for the object with its left hand, grasp it, and then pull it towards  
381 its body by counteracting the force exerted by the robotic arm, which increased proportionally to the  
382 horizontal displacement. A trial was considered successful if the robot end-effector passed a  
383 predetermined distance threshold. Upon success, the monkey automatically received a liquid food  
384 reward through a sipper tube.

385

### 386 *4.2.2. Identification of the 2D motor manifold*

387

388 M1 cortical activity recorded over an entire session of the behavioral reach-and-grasp task (including  
389 625 trials and all periods between trials), was used to compute the axes spanning the 2D manifold,  
390 i.e., the neural modes coefficient matrix  $U_{weights}$  (**Figure 1A**). The firing rate of each M1 channel  
391 was computed offline as the number of spikes in non-overlapping bins of 10 ms. PCA was then  
392 applied to the firing rates of the 48 M1 channels to derive the  $U_{weights}$  matrix, as follows:

393

$$X = YU_{weights}^T$$

394

395 Where,  $X$  [*time x M1 chs*] is the matrix of firing rates of the 48 M1 channels,  $U_{weights}$   
396 [*M1 chs x M1 chs*] is the matrix of PC coefficients, and  $Y$  [*time x M1 chs*] contains the PC scores,  
397 i.e., the representation of  $X$  in the PC space.

398

399 The  $U_{weights}$  matrix thus computed was used in the brain control experiments as a linear  
400 transformation between the firing rates and the neural activity along the main neural modes [15]:

401

$$L = ZU_{weights}$$

402

403 Where  $Z$  [*time x M1 chs*] is the matrix of neural firing rates of the 48 M1 channels and  
404  $L$  [*time x M1 chs*] is the matrix of the 48 latent variables, i.e., the cortical activity projected along  
405 the neural modes. Based on their modulation depth during the behavioral motor task (see Results),

404 we selected the second and third latent variables, hereafter referred to as  $L_y$  and  $L_x$  respectively, as  
405 control signals in the brain control experiments.

406

#### 407 4.2.3. *Brain cursor control experiment*

408

409 The monkey was seated in a custom primate chair in front of a large computer screen. The left arm  
410 and hand were immobilized with padded plastic restraints. Latent neural activity directly controlled  
411 a moving cursor on the screen that provided visual feedback to the animal in real-time (**Figure 1B**).  
412 Specifically, after being downsampled at 25 Hz, the two latent variables  $L_x$  and  $L_y$  were linearly  
413 transformed into the cursor horizontal (x) and vertical (y) coordinates, respectively, as follows:

414

$$x = g_x L_x + b_x$$

415

$$y = g_y L_y + b_y$$

416 The gains  $g_x$  and  $g_y$  were manually set to 0.4 and 0.25, respectively, based on the size of the screen  
417 and the amplitude of the modulation of  $L_x$  and  $L_y$ , and kept constant for the overall experimental  
418 protocol. The offset values  $b_x$  and  $b_y$  were adjusted during each session depending on the baseline  
419 neural activity, which changed across sessions likely because of changes in neural recordings (**Supp.**  
420 **Figure 3A-B**). The cursor was prevented from exiting the screen through boundaries on its x and y  
421 coordinates.

422

423 The task consisted in delayed 2D point-to-point cursor control. The animal had to maintain latent  
424 neural activity at a baseline level and then to up-regulate it. More precisely, at the beginning of a trial,  
425 an empty square, representing the baseline box, appeared in the lower left corner of the screen. The  
426 animal had to hold the cursor within this square for 0.5 s. Upon success in this first phase, the baseline  
427 square disappeared and a new empty rectangle appeared on the screen, in a position that differed  
428 depending on the phase of the experimental protocol (see **Figure 1C** and the “Brain cursor control  
429 timeline” section). The monkey had to move the cursor to this target box and hold it within it for 0.1  
430 s. To succeed and thus receive a liquid food reward, the animal had to complete the overall task within  
431 8 s. The distance between the target and the baseline boxes was set manually and varied during each  
432 session, trying to get the animal to modulate its neural activity as much as possible, but at the same  
433 time avoiding demotivating the animal.

434

#### 435 4.2.4. *Brain cursor control timeline*

436

437 We analyzed 38 sessions (spanned over 113 days, **Supp. Table 1**) of brain cursor control experiment,  
438 during which the monkey was gradually trained to control up to 2 DoFs and to reach different target  
439 positions (**Figure 1C**). During the first 10 sessions, the monkey had to modulate the cortical activity  
440 along only one neural mode (1 DoF control). The cursor was moved only along the y axis  
441 proportionally to the activation of  $L_y$  (the x coordinate was set to 0), to reach a vertical target. We  
442 then introduced the horizontal component to the cursor trajectory that was proportional to the  
443 activation of  $L_x$  and maintained this 2 DoF control configuration for all the subsequent sessions. For  
444 one day we presented only vertical targets, forcing the monkey to up-regulate the activity of  $L_y$  while  
445 maintaining the activity of  $L_x$  at a baseline level to succeed in the task. We then shifted the target  
446 along the horizontal axis in a diagonal position to promote the simultaneous modulation of  $L_y$  and  
447  $L_x$ . After 4 sessions, we started to present only horizontal targets to encourage the monkey to  
448 exclusively up-modulate  $L_x$  while keeping  $L_y$  at a baseline level. Once the animal achieved a success  
449 rate comparable to the other tasks (after 5 sessions), we started to randomly alternate vertical and

450 horizontal targets and repeated for 3 sessions. The next 15 days of recordings consisted in randomly  
451 alternating vertical, horizontal, and diagonal targets.

452

453 Few sessions were excluded from the analysis because the triggers designating the task events were  
454 not properly recorded, and few others because the monkey was not motivated to perform the task as  
455 she was not in perfect health.

456

#### 457 4.2.5. Brain PNS control experiment

458

459 During the brain PNS control experiment, the animal performed the cursor control task while latent  
460 neural activity drove both the cursor movement and the stimulation amplitude of preselected channels  
461 of the median and radial Mk-TIMEs (**Figure 1B**). We selected a channel of the median Mk-TIME  
462 that recruited flexor muscles to trigger hand closure and a channel of the radial Mk-TIME that  
463 recruited extensor muscles to produce hand opening. Stimulation delivered by the median channel  
464 was controlled by  $L_x$ , whereas stimulation applied from the radial channel was controlled by  $L_y$ .  
465 Specifically, we modulated the amplitude  $amp(t)$  of the pulses injected through the channel of  
466 interest over time based on a linear mapping with the latent variable activation  $L(t)$ , smoothed by a  
467 100 ms moving average filter:

$$468 \quad amp(t) = amp_{min} + gain \cdot (L(t) - L_{thr})$$
$$469 \quad gain = \frac{amp_{max} - amp_{min}}{L_{max} - L_{thr}}$$

$$470 \quad \text{if } amp > amp_{max} \Rightarrow amp = amp_{max}$$

471

472 The pulse-width was fixed at 40  $\mu$ s, and the frequency of the pulses at 50 Hz. The parameters of the  
473 linear relationship between  $amp(t)$  and  $L(t)$  were tuned during a calibration phase at the beginning  
474 of each session, as specified in the “Calibration of the parameters for brain PNS control” section.  
475 Stimulation was enabled only after the animal succeeded in the baseline phase of the cursor control  
476 task and disabled in between trials.

477

478 The experiment was performed for 6 sessions, in which we enabled one or both types of stimulation  
479 (i.e., median, or radial) and presented one or both types of target (i.e., vertical, or horizontal), as  
480 specified in **Supp. Table 2**.

481

#### 482 4.2.6. Calibration of the parameters for brain PNS control

483

484 At the beginning of each session of the brain PNS control experiment, a calibration procedure was  
485 performed to tune the parameters of the linear relationship between latent variable activation and  
486 stimulation amplitude (**Supp. Figure 4**). In the first step, the animal performed the brain cursor  
487 control task for approximately 10 minutes, alternating between vertical and horizontal targets (**Supp.**  
488 **Figure 4A**). This phase served to determine the range of latent variable modulation that the animal  
489 exhibited for the two target types on that day. Based on these recordings, we determined  $L_{max}$  and  
490  $L_{thr}$ .  $L_{max}$  of a given latent variable was set to be just above the maximum of its activation averaged  
491 across the successful trials with the target type for which it was leading (horizontal target for  $L_x$  and  
492 vertical target for  $L_y$ ). Conversely,  $L_{thr}$  was set to be just above the maximum of the latent variable  
493 activation averaged across the successful trials with the other target type. In this way, we aimed to  
494 exploit a wide range of neural modulation in PNS control, while limiting spurious stimuli due to a  
495 non-straight path of the cursor to the target (ideally, median nerve stimulation, controlled by  $L_x$ ,  
496 would have been activated only for horizontal targets and radial nerve stimulation, controlled by  $L_y$ ,

497 only for vertical targets). In a second step, we applied stimulation bursts from the selected Mk-TIME  
498 channels with increasing amplitude values (pulse-width of 40 us, frequency of 50 Hz) (**Supp. Figure**  
499 **4B**). In this way, we derived the amplitude range [ $amp_{min}$ ,  $amp_{max}$ ] that we used for brain PNS  
500 control.  $amp_{min}$  corresponded to the minimum amplitude at which a movement twitch occurred and  
501  $amp_{max}$  corresponded to the amplitude at which a strong contraction movement was observed. At  
502 the end of the calibration phase, the experimenter set the calibration parameters using a graphical user  
503 interface on the control computer.

504

#### 505 4.2.7. *Data acquisition*

506

507 Neural signals were acquired at 30 kHz with a Neural Signal Processor (Blackrock Microsystems,  
508 USA) using the Cereplex-E headstage. Multiunit activity was thresholded (6.25x root mean square  
509 value calculated over a window of 5 s) to extract spike events. During the brain control experiments,  
510 a custom C++ routine (Visual Studio®, USA), running on a control computer, processed the neural  
511 signals in real-time to compute the latent variables. Specifically, the firing rate of each M1 channel  
512 was computed as the number of spikes in overlapping bins of 100 ms with a sliding window of 10  
513 ms. Stimulation artifacts (only for the brain PNS control experiment) and then movement artifacts  
514 were suppressed as described in the section below. The latent variables  $L_y$  and  $L_x$  were then calculated  
515 by multiplying the noise-free firing rates of the 48 M1 channels per the  $U_{weights}$  matrix.  $L_y$  and  $L_x$   
516 were streamed via UDP to a computer running a custom MATLAB (MathWorks, Natick MA) routine.  
517 This routine converted the latent variables into cursor coordinates, placed the visual targets on the  
518 screen, and controlled a peristaltic pump that delivered a liquid food reward. The timing of various  
519 events in the task, such as start and end of a trial, success, etc., were sent as digital triggers to the  
520 Neural Signal Processor through a synchronization board (National Instruments, US). During the  
521 brain PNS control experiment, the conversion of the latent variables into amplitude of stimulation  
522 was implemented by the C++ routine running on the control computer.

523

524 In the sessions following the implantation of the EMG electrodes, bipolar EMG signals were acquired  
525 at 12 kHz by the RZ2 processor (RZ2, Tucker David Technologies, USA) after amplification (1000×,  
526 PZ5, Tucker David Technologies, USA) using a 16-channels active headstage (LP32CH - 16, Tucker  
527 Davis Technologies, USA).

528

529 In the last two sessions of brain PNS control experiment, we measured the grip force using a custom-  
530 made sensor [18] or the wrist extension force using a commercial dual-range force sensor (Vernier,  
531 EducaTEC AG,CH) when median or radial nerve stimulation was enabled, respectively. These  
532 signals were recorded at 1 kHz using the RZ2 processor.

533

#### 534 4.2.8. *Artifacts removal from neural recordings*

535

536 Stimulation artifacts were removed from neural recordings by subtracting the firing rate of a reference  
537 M1 channel, found to be silent when stimulation was not applied, from the firing rate of all M1  
538 channels.

539

540 Movement artifacts were suppressed by ensuring that if more than 40 channels (over the 128 channels  
541 of the three implanted brain arrays) had a firing rate greater than 20 spikes/s, those channels were  
542 discarded (i.e., their firing rate was set to 0).

543

#### 544 4.2.9. *Electrical stimulation*

545  
546  
547  
548  
549  
550  
551  
552  
553  
554  
555  
556  
557  
558  
559  
560  
561  
562  
563  
564  
565  
566  
567  
568  
569  
570  
571  
572  
573  
574  
575  
576  
577  
578  
579  
580  
581  
582  
583  
584  
585  
586  
587  
588  
589  
590  
591  
592  
593  
594

Electrical stimulation was delivered through a 32-channels headstage (LP32CH - 32, Tucker Davis Technologies) using the IZ2H stimulator (Tucker David Technologies, USA) as bursts of asymmetric charge-balanced cathodic-first biphasic pulses. Stimulation waveforms were digitally built within the processor unit (RZ2, Tucker Davis Technologies) using the user programming interface OpenEx suite (Tucker Davis Technologies). Custom code was used to communicate with the controller through C++ (Visual Studio) API.

#### 4.2.10. Hand muscle activity monitoring

To show that the animal performed the brain cursor control task without exploiting hand movements, we recorded the corresponding muscle activity in two sessions after the implantation of the EMG electrodes. In these two sessions the monkey also performed the behavioral reach-and-grasp task. We compared the EMG activity of the implanted muscles acquired during the brain cursor control task with the activity measured during the behavioral task (**Supp. Figure 1**).

### 4.3. Data analysis

#### 4.3.1. Analysis of latent variables modulation during the behavioral task

To select two among the three main latent variables to be used as control signals in the brain control experiments, we computed their modulation depth during the behavioral reach-and-grasp task. We applied a 50 ms moving average filter to the latent variable activation signal and then calculated the difference between its maximum and minimum values in each motor trial.

#### 4.3.2. Analysis of changes in neural recordings and tuning

To evaluate the changes in neural recordings across sessions, we computed the mean firing rate of M1 channels during the baseline phase of the cursor control task (i.e., when the cursor was in the baseline box) and averaged across all the trials of each session (**Supp. Figure 3A**). Similarly, for each trial we computed the mean activity of latent variables  $L_x$  and  $L_y$  during the baseline phase (**Supp. Figure 3B**).

To evaluate the neural tuning strategy used by the monkey to reach the different targets, we measured the modulation depth of the 48 M1 channels. Modulation depth was computed as the difference between the channel's maximum firing rate during the target holding phase of the cursor control task (i.e., when the cursor was in the target box) and its mean firing rate during the baseline phase. To focus on which channels were preferentially modulated rather than to what extent, the modulation depth of all channels was normalized to the maximum across channels for each trial. The neural tuning strategy of each session was considered as the 48-element vector obtained by averaging over all trials. The variability in neural tuning strategy across sessions within and between the two main phases of the experimental protocol (i.e., single-task and multi-task phases) (**Figure 3A**), was calculated as the Euclidean norm of the difference in neural tuning strategy between each pair of sessions within the same phase or between phases. The neural tuning strategy of each protocol phase (**Figure 3B**) was considered as the average over all trials of all sessions belonging to that phase. The most modulated channels (**Supp. Figure 3C**) were considered as those showing a modulation depth higher than  $q3 + w \times (q3 - q1)$ , where  $w$  is a multiplier constant, and  $q1$  and  $q3$  are the 25<sup>th</sup> and 75<sup>th</sup> percentiles of all channels data related to that phase and target.  $w$  was set to 1.5 for the vertical and diagonal targets, 2.5 for the horizontal target.

#### 595 4.3.3. *Performance assessment in the brain cursor control experiment*

596

597 Performance in the brain cursor control experiment was assessed by counting the percentage of  
598 successful trials and measuring the execution time and movement error. Trials were considered  
599 successful if, in less than 8 s, the monkey was able to i) hold the cursor in the baseline box for 0.5 s  
600 and ii) reach the target box and hold the cursor inside it for 0.1 s. Among the successful trials, we  
601 distinguished the successes on the first attempt, i.e., the trials in which the monkey succeeded in  
602 holding the cursor in the baseline and target boxes for the required timespans on the first time the  
603 cursor entered the respective box. The execution time of successful trials was calculated as the  
604 interval between the appearance of the baseline box on the screen and the completion of the task. The  
605 movement error was computed for successful trials as  $ME = \sum_{i=1}^n d_i/n$  [44], where  $d_i$  is the distance  
606 of the  $i_{th}$  point of the cursor path from the line connecting the centers of the baseline and target boxes  
607 ( $d_i \geq 0$ ).  $ME$  measures the offset of the cursor path from the ideal straight trajectory. Execution time  
608 and  $ME$  outliers (elements lying outside 1.5 times the interquartile range) were removed for each  
609 session. Linear regression models were fitted to the data of the described measures over the sessions  
610 the animal performed the same type of task.

611

#### 612 4.3.4. *Performance assessment in the brain PNS control experiment*

613

614 We evaluated the monkey's ability to successfully perform the brain cursor control task even when  
615 PNS was enabled, by comparing the success rate obtained during the brain PNS control task with that  
616 obtained during the calibration phase on the same session. Results obtained for the same target type  
617 (vertical and horizontal) were pairwise compared.

618

619 For the two sessions in which only one PNS type was enabled for both vertical and horizontal targets  
620 (sessions 43 and 44, **Supp. Table 2**), we assessed the percentage of successful trials in which  
621 stimulation was target-selectively applied. Specifically, median nerve stimulation (session 43), which  
622 was controlled by  $L_x$ , should ideally have been delivered for the horizontal target and kept off for the  
623 vertical target. Conversely, radial nerve stimulation (session 44), which was controlled by  $L_y$ , should  
624 ideally have been delivered for the vertical target and kept off for the horizontal target. This analysis  
625 quantifies the monkey's ability to modulate the two latent variables independently and also reveals  
626 the appropriateness of the chosen PNS control parameters.

627

#### 628 4.3.5. *EMG and kinetic signals processing*

629

630 EMG signals were band-pass filtered between 50 and 500 Hz. A Savitzky-Golay filter with a  
631 smoothing window of 2.5 ms was applied to remove stimulation artifacts. The envelope was  
632 computed by rectifying the EMG signal and applying a low-pass filter at 6 Hz. Signals were  
633 normalized to the maximal muscle activity obtained across the trials of interest.

634

635 Grip and wrist force signals were low-pass filtered at 10 Hz and detrended by subtracting a cubic  
636 spline fitted on the data outside the stimulation periods. Voltage values were converted to Newtons  
637 using the calibration curves of the two sensors [18], (Vernier, EducaTEC AG,CH). Signals were  
638 normalized to the maximum across the trials of interest.

639

#### 640 4.3.6. *Statistics*

641

642 Data are reported as mean  $\pm$  standard error of the mean (s.e.m.) unless specified otherwise. Statistical  
643 significance of linear regression models was evaluated using the F-test. Statistical significance of the  
644 difference between two samples was evaluated using the non-parametric Wilcoxon rank-sum test for  
645 unpaired data and the non-parametric Wilcoxon signed-rank test for paired data.  
646

647

648

## 648 **Acknowledgements**

649

650 The authors would like to thank Prof. Eric M. Rouiller and Dr. Marco Capogrosso for helpful advice  
651 and discussions; Dr. Sophie Wurth and Dr. Simon Borgognon for help with the experiments; J.  
652 Maillard and L. Bossy for the care provided to the monkey; A. Zbinden for the veterinary survey of  
653 the animal. Funding for this study was provided by the Swiss National Science Foundation grant  
654 NeuGrasp (205321\_170032), the Wyss Center for Bio and Neuroengineering, and the Bertarelli  
655 Foundation.  
656

657

658

## 658 **Competing Interests**

659

660 The authors declare no competing interests.  
661

662

663

## 663 **References**

664

665 [1] J. L. Collinger, M. L. Boninger, T. M. Bruns, K. Curley, W. Wang, and D. J. Weber,  
666 “Functional priorities, assistive technology, and brain-computer interfaces after spinal cord injury,”  
667 *J Rehabil Res Dev*, vol. 50, no. 2, pp. 145–160, 2013, doi: 10.1682/jrrd.2011.11.0213.

668 [2] L. R. Hochberg *et al.*, “Reach and grasp by people with tetraplegia using a neurally controlled  
669 robotic arm,” *Nature*, vol. 485, no. 7398, Art. no. 7398, May 2012, doi: 10.1038/nature11076.

670 [3] C. T. Moritz, S. I. Perlmutter, and E. E. Fetz, “Direct control of paralysed muscles by cortical  
671 neurons,” *Nature*, vol. 456, no. 7222, Art. no. 7222, Dec. 2008, doi: 10.1038/nature07418.

672 [4] E. A. Pohlmeyer *et al.*, “Toward the Restoration of Hand Use to a Paralyzed Monkey: Brain-  
673 Controlled Functional Electrical Stimulation of Forearm Muscles,” *PLOS ONE*, vol. 4, no. 6, p.  
674 e5924, giu 2009, doi: 10.1371/journal.pone.0005924.

675 [5] C. Ethier, E. R. Oby, M. J. Bauman, and L. E. Miller, “Restoration of grasp following paralysis  
676 through brain-controlled stimulation of muscles,” *Nature*, vol. 485, no. 7398, Art. no. 7398, May  
677 2012, doi: 10.1038/nature10987.

678 [6] M. Capogrosso *et al.*, “A brain–spine interface alleviating gait deficits after spinal cord injury  
679 in primates,” *Nature*, vol. 539, no. 7628, pp. 284–288, Nov. 2016, doi: 10.1038/nature20118.

680 [7] B. Barra *et al.*, “Epidural Electrical Stimulation of the Cervical Dorsal Roots Restores  
681 Voluntary Arm Control In Paralyzed Monkeys,” *bioRxiv*, p. 2020.11.13.379750, Apr. 2021, doi:  
682 10.1101/2020.11.13.379750.

683 [8] C. E. Bouton *et al.*, “Restoring cortical control of functional movement in a human with  
684 quadriplegia,” *Nature*, vol. 533, no. 7602, pp. 247–250, May 2016, doi: 10.1038/nature17435.

685 [9] A. B. Ajiboye *et al.*, “Restoration of reaching and grasping in a person with tetraplegia

- 686 through brain-controlled muscle stimulation: a proof-of-concept demonstration,” *Lancet*, vol. 389,  
687 no. 10081, pp. 1821–1830, May 2017, doi: 10.1016/S0140-6736(17)30601-3.
- 688 [10] S. C. I. Colachis *et al.*, “Dexterous Control of Seven Functional Hand Movements Using  
689 Cortically-Controlled Transcutaneous Muscle Stimulation in a Person With Tetraplegia,” *Front.*  
690 *Neurosci.*, vol. 12, 2018, doi: 10.3389/fnins.2018.00208.
- 691 [11] G. Pfurtscheller, G. R. Müller, J. Pfurtscheller, H. J. Gerner, and R. Rupp, “‘Thought’ –  
692 control of functional electrical stimulation to restore hand grasp in a patient with tetraplegia,”  
693 *Neuroscience Letters*, vol. 351, no. 1, pp. 33–36, Nov. 2003, doi: 10.1016/S0304-3940(03)00947-9.
- 694 [12] C. E. King, P. T. Wang, C. M. McCrimmon, C. C. Chou, A. H. Do, and Z. Nenadic, “The  
695 feasibility of a brain-computer interface functional electrical stimulation system for the restoration of  
696 overground walking after paraplegia,” *Journal of NeuroEngineering and Rehabilitation*, vol. 12, no.  
697 1, p. 80, Settembre 2015, doi: 10.1186/s12984-015-0068-7.
- 698 [13] S. Shokur, A. Mazzoni, G. Schiavone, D. J. Weber, and S. Micera, “A modular strategy for  
699 next-generation upper-limb sensory-motor neuroprostheses,” *Med*, vol. 2, no. 8, pp. 912–937, Agosto  
700 2021, doi: 10.1016/j.medj.2021.05.002.
- 701 [14] M. Badi *et al.*, “Intrafascicular peripheral nerve stimulation produces fine functional hand  
702 movements in primates,” *Science Translational Medicine*, Oct. 2021, doi:  
703 10.1126/scitranslmed.abg6463.
- 704 [15] J. A. Gallego, M. G. Perich, L. E. Miller, and S. A. Solla, “Neural Manifolds for the Control  
705 of Movement,” *Neuron*, vol. 94, no. 5, pp. 978–984, Jun. 2017, doi: 10.1016/j.neuron.2017.05.025.
- 706 [16] G. F. Elsayed and J. P. Cunningham, “Structure in neural population recordings: an expected  
707 byproduct of simpler phenomena?,” *Nat Neurosci*, vol. 20, no. 9, Art. no. 9, Sep. 2017, doi:  
708 10.1038/nn.4617.
- 709 [17] P. T. Sadtler *et al.*, “Neural constraints on learning,” *Nature*, vol. 512, no. 7515, Art. no. 7515,  
710 Aug. 2014, doi: 10.1038/nature13665.
- 711 [18] B. Barra *et al.*, “A versatile robotic platform for the design of natural, three-dimensional  
712 reaching and grasping tasks in monkeys,” *J. Neural Eng.*, vol. 17, no. 1, p. 016004, Dec. 2019, doi:  
713 10.1088/1741-2552/ab4c77.
- 714 [19] E. R. Oby *et al.*, “New neural activity patterns emerge with long-term learning,” *PNAS*, vol.  
715 116, no. 30, pp. 15210–15215, Jul. 2019, doi: 10.1073/pnas.1820296116.
- 716 [20] A. S. Dickey, A. Suminski, Y. Amit, and N. G. Hatsopoulos, “Single-unit stability using  
717 chronically implanted multielectrode arrays,” *J Neurophysiol*, vol. 102, no. 2, pp. 1331–1339, Aug.  
718 2009, doi: 10.1152/jn.90920.2008.
- 719 [21] R. D. Flint, M. R. Scheid, Z. A. Wright, S. A. Solla, and M. W. Sutzky, “Long-Term Stability  
720 of Motor Cortical Activity: Implications for Brain Machine Interfaces and Optimal Feedback  
721 Control,” *J Neurosci*, vol. 36, no. 12, pp. 3623–3632, Mar. 2016, doi: 10.1523/JNEUROSCI.2339-  
722 15.2016.
- 723 [22] J. E. Downey, N. Schwed, S. M. Chase, A. B. Schwartz, and J. L. Collinger, “Intracortical  
724 recording stability in human brain-computer interface users,” *J Neural Eng*, vol. 15, no. 4, p. 046016,  
725 Aug. 2018, doi: 10.1088/1741-2552/aab7a0.



- 726 [23] K. Ganguly and J. M. Carmena, “Emergence of a stable cortical map for neuroprosthetic  
727 control,” *PLoS Biol*, vol. 7, no. 7, p. e1000153, Jul. 2009, doi: 10.1371/journal.pbio.1000153.
- 728 [24] A. L. Orsborn, H. G. Moorman, S. A. Overduin, M. M. Shanechi, D. F. Dimitrov, and J. M.  
729 Carmena, “Closed-loop decoder adaptation shapes neural plasticity for skillful neuroprosthetic  
730 control,” *Neuron*, vol. 82, no. 6, pp. 1380–1393, Jun. 2014, doi: 10.1016/j.neuron.2014.04.048.
- 731 [25] W. Bishop *et al.*, “Self-recalibrating classifiers for intracortical brain-computer interfaces,” *J*  
732 *Neural Eng*, vol. 11, no. 2, p. 026001, Apr. 2014, doi: 10.1088/1741-2560/11/2/026001.
- 733 [26] B. Jarosiewicz *et al.*, “Virtual typing by people with tetraplegia using a self-calibrating  
734 intracortical brain-computer interface,” *Science Translational Medicine*, vol. 7, no. 313, pp.  
735 313ra179-313ra179, Nov. 2015, doi: 10.1126/scitranslmed.aac7328.
- 736 [27] M. A. Schwemmer *et al.*, “Meeting brain–computer interface user performance expectations  
737 using a deep neural network decoding framework,” *Nat Med*, vol. 24, no. 11, Art. no. 11, Nov. 2018,  
738 doi: 10.1038/s41591-018-0171-y.
- 739 [28] A. D. Degenhart *et al.*, “Stabilization of a brain–computer interface via the alignment of low-  
740 dimensional spaces of neural activity,” *Nat Biomed Eng*, vol. 4, no. 7, Art. no. 7, Jul. 2020, doi:  
741 10.1038/s41551-020-0542-9.
- 742 [29] S. Raspopovic *et al.*, “Restoring Natural Sensory Feedback in Real-Time Bidirectional Hand  
743 Prostheses,” *Science Translational Medicine*, vol. 6, no. 222, pp. 222ra19-222ra19, Feb. 2014, doi:  
744 10.1126/scitranslmed.3006820.
- 745 [30] P. T. Sadtler, S. I. Ryu, E. C. Tyler-Kabara, B. M. Yu, and A. P. Batista, “Brain–computer  
746 interface control along instructed paths,” *J. Neural Eng.*, vol. 12, no. 1, p. 016015, Jan. 2015, doi:  
747 10.1088/1741-2560/12/1/016015.
- 748 [31] L. R. Hochberg *et al.*, “Neuronal ensemble control of prosthetic devices by a human with  
749 tetraplegia,” *Nature*, vol. 442, no. 7099, Art. no. 7099, Jul. 2006, doi: 10.1038/nature04970.
- 750 [32] S.-P. Kim, J. D. Simeral, L. R. Hochberg, J. P. Donoghue, and M. J. Black, “Neural control  
751 of computer cursor velocity by decoding motor cortical spiking activity in humans with tetraplegia,”  
752 *J Neural Eng*, vol. 5, no. 4, pp. 455–476, Dec. 2008, doi: 10.1088/1741-2560/5/4/010.
- 753 [33] S.-P. Kim, J. D. Simeral, L. R. Hochberg, J. P. Donoghue, G. M. Friehs, and M. J. Black,  
754 “Point-and-click cursor control with an intracortical neural interface system by humans with  
755 tetraplegia,” *IEEE Trans Neural Syst Rehabil Eng*, vol. 19, no. 2, pp. 193–203, Apr. 2011, doi:  
756 10.1109/TNSRE.2011.2107750.
- 757 [34] C. E. Vargas-Irwin *et al.*, “Watch, Imagine, Attempt: Motor Cortex Single-Unit Activity  
758 Reveals Context-Dependent Movement Encoding in Humans With Tetraplegia,” *Frontiers in Human*  
759 *Neuroscience*, vol. 12, 2018, Accessed: Feb. 24, 2022. [Online]. Available:  
760 <https://www.frontiersin.org/article/10.3389/fnhum.2018.00450>
- 761 [35] N. G. Hatsopoulos and A. J. Suminski, “Sensing with the Motor Cortex,” *Neuron*, vol. 72, no.  
762 3, pp. 477–487, Nov. 2011, doi: 10.1016/j.neuron.2011.10.020.
- 763 [36] J. A. Gallego, T. R. Makin, and S. D. McDougle, “Going beyond primary motor cortex to  
764 improve brain–computer interfaces,” *Trends in Neurosciences*, vol. 45, no. 3, pp. 176–183, Mar.  
765 2022, doi: 10.1016/j.tins.2021.12.006.

- 766 [37] S. R. Soekadar, N. Birbaumer, M. W. Slutzky, and L. G. Cohen, “Brain-machine interfaces  
767 in neurorehabilitation of stroke,” *Neurobiol Dis*, vol. 83, pp. 172–179, Nov. 2015, doi:  
768 10.1016/j.nbd.2014.11.025.
- 769 [38] J. J. Daly, R. Cheng, J. Rogers, K. Litinas, K. Hrovat, and M. Dohring, “Feasibility of a new  
770 application of noninvasive Brain Computer Interface (BCI): a case study of training for recovery of  
771 volitional motor control after stroke,” *J Neurol Phys Ther*, vol. 33, no. 4, pp. 203–211, Dec. 2009,  
772 doi: 10.1097/NPT.0b013e3181c1fc0b.
- 773 [39] A. Biasucci *et al.*, “Brain-actuated functional electrical stimulation elicits lasting arm motor  
774 recovery after stroke,” *Nat Commun*, vol. 9, no. 1, Art. no. 1, Jun. 2018, doi: 10.1038/s41467-018-  
775 04673-z.
- 776 [40] M. Bonizzato *et al.*, “Brain-controlled modulation of spinal circuits improves recovery from  
777 spinal cord injury,” *Nat Commun*, vol. 9, no. 1, Art. no. 1, Aug. 2018, doi: 10.1038/s41467-018-  
778 05282-6.
- 779 [41] J. G. McPherson, R. R. Miller, and S. I. Perlmutter, “Targeted, activity-dependent spinal  
780 stimulation produces long-lasting motor recovery in chronic cervical spinal cord injury,” *Proc Natl  
781 Acad Sci U S A*, vol. 112, no. 39, pp. 12193–12198, Sep. 2015, doi: 10.1073/pnas.1505383112.
- 782 [42] A. Selfslagh *et al.*, “Non-invasive, Brain-controlled Functional Electrical Stimulation for  
783 Locomotion Rehabilitation in Individuals with Paraplegia,” *Sci Rep*, vol. 9, no. 1, Art. no. 1, May  
784 2019, doi: 10.1038/s41598-019-43041-9.
- 785 [43] C. Ethier, J. Gallego, and L. Miller, “Brain-controlled neuromuscular stimulation to drive  
786 neural plasticity and functional recovery,” *Current Opinion in Neurobiology*, vol. 33, pp. 95–102,  
787 Agosto 2015, doi: 10.1016/j.conb.2015.03.007.
- 788 [44] J. D. Simeral, S.-P. Kim, M. J. Black, J. P. Donoghue, and L. R. Hochberg, “Neural control  
789 of cursor trajectory and click by a human with tetraplegia 1000 days after implant of an intracortical  
790 microelectrode array,” *J Neural Eng*, vol. 8, no. 2, p. 025027, Apr. 2011, doi: 10.1088/1741-  
791 2560/8/2/025027.
- 792
- 793

794 **Figures**

795

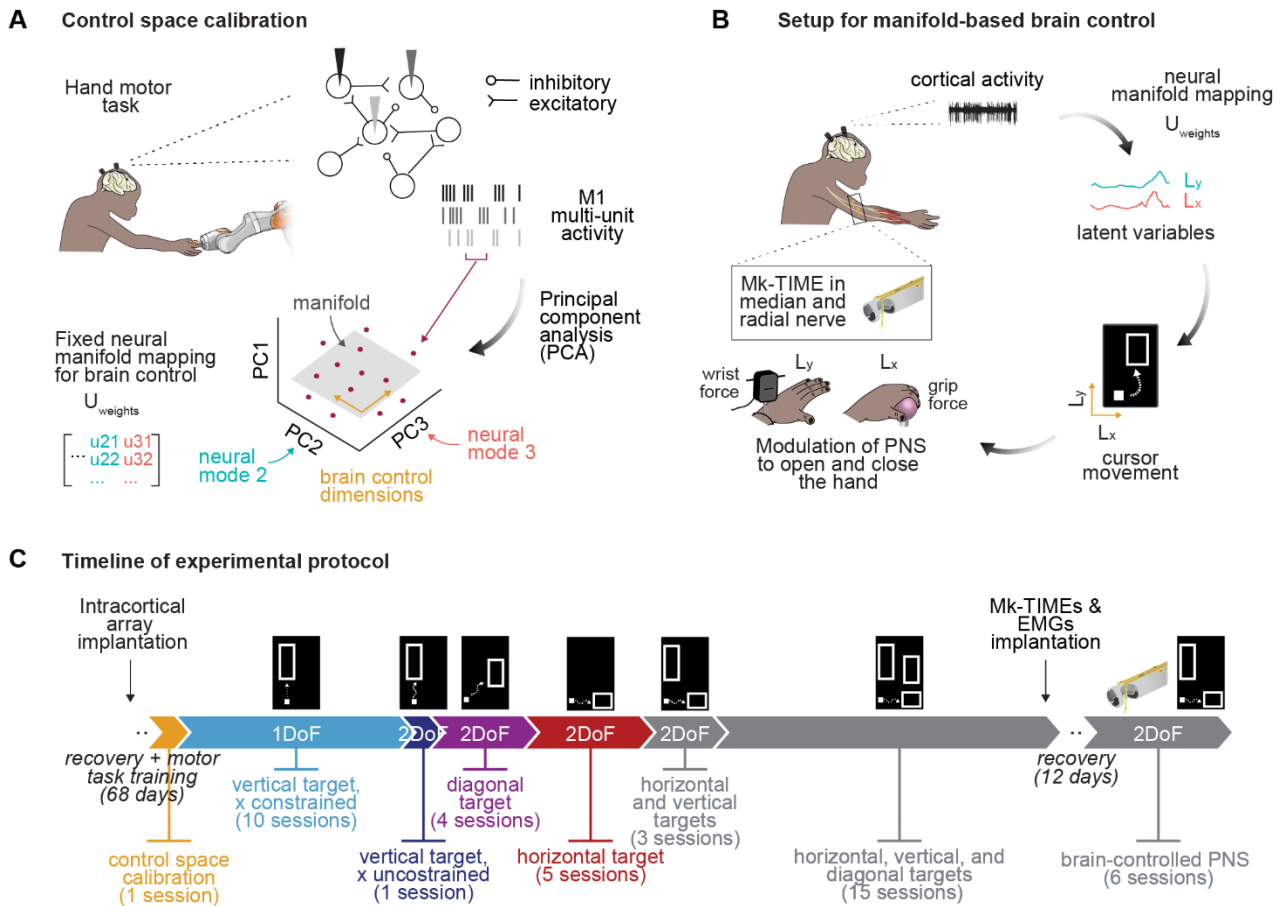

796

797

798 **Figure 1 | Experimental protocol for 2D manifold-based direct control.** **A** Calibration of the brain control space based  
 799 on neural modes, illustrated in a simplified, conceptual way with three recording channels. We applied principal  
 800 component analysis (PCA) to M1 multi-unit activity recorded while the animal was performing a hand motor task and  
 801 evaluated the neural space defined by the three main PCs (neural modes). The firing rate of each channel at each time  
 802 instant is a point (red dot) in this space. We chose the 2D manifold (grey plane) defined by the second and third neural  
 803 modes (orange arrows) as the control space for subsequent brain control experiments. The  $U_{weights}$  matrix contains the  
 804 coefficients of the second and third PCs. **B** Setup for manifold-based direct control. The monkey drove a cursor (white  
 805 square) in 2D (orange arrows) to reach a target box (empty rectangle) by modulating its cortical activity. The cortical  
 806 activity was projected in the manifold-based control space by multiplying the firing rate of M1 channels to the  $U_{weights}$   
 807 matrix. The neural dynamics along the second and third neural modes (i.e., the second and third latent variables  $L_y$   
 808 and  $L_x$ ), thus computed, were linearly mapped to the cursor vertical (y) and horizontal (x) coordinates, respectively. In a  
 809 second phase,  $L_y$  and  $L_x$  were also linearly linked to the stimulation amplitude of two intrafascicular electrodes implanted  
 810 in the radial and median nerves, respectively, to evoke hand opening and closing. **C** Timeline of experimental protocol.  
 811 The different phases of brain control experiment are depicted, i.e., the number of DoFs that the monkey had to control  
 812 and the position of the target to reach with the cursor.

813

814

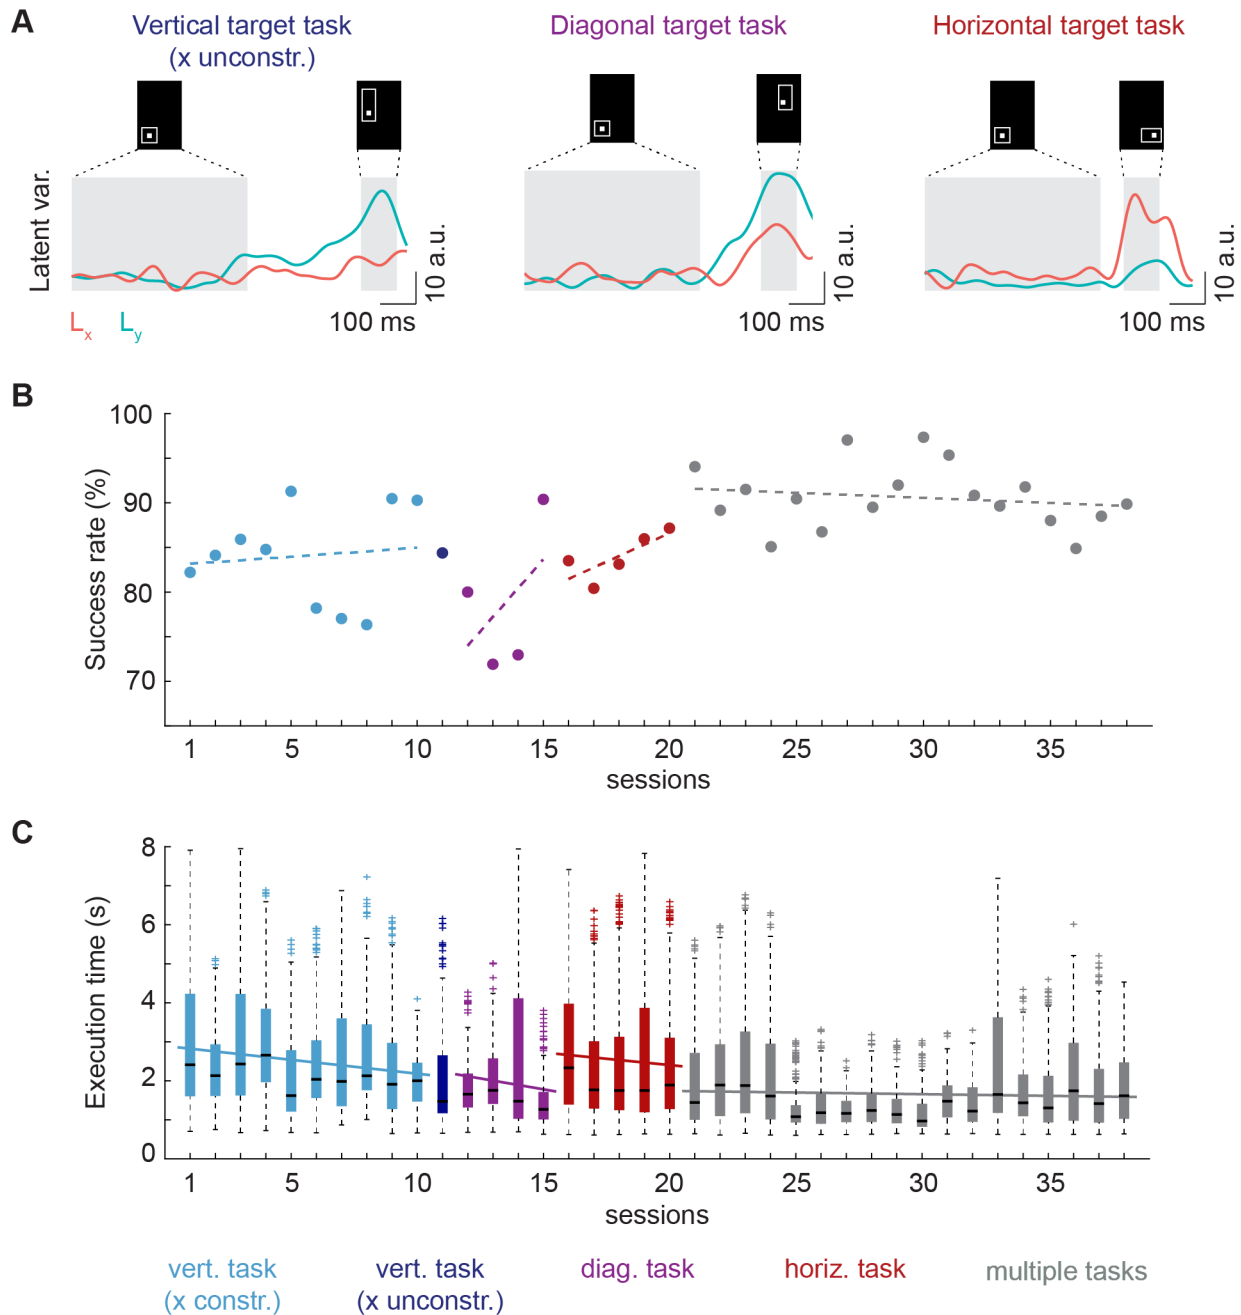

815

816

817 **Figure 2 | Performance of manifold-based BMI.** **A** Activation of the latent variables  $L_x$  and  $L_y$  (linearly mapped to the  
 818 cursor x and y coordinates, respectively) during representative successful trials of 2D cursor control for the three types of  
 819 task (vertical, horizontal, and diagonal target). The task consisted in (i) maintaining the cursor in a baseline box for 0.5 s,  
 820 (ii) steering the cursor toward the target box and holding it inside it for 0.1 s. The task had to be completed within 8 s for  
 821 the monkey to succeed. **B** Success rate over sessions. **C** Execution time of successful trials over sessions, after outliers  
 822 removal. In panels **B** and **C** the different colors indicate the different types of task performed by the animal throughout  
 823 the protocol. Linear regression models were fitted to the data over the sessions with the same task (full line when  
 824 significant, i.e.,  $p < 0.05$ , F-test, dashed line otherwise).

825

826

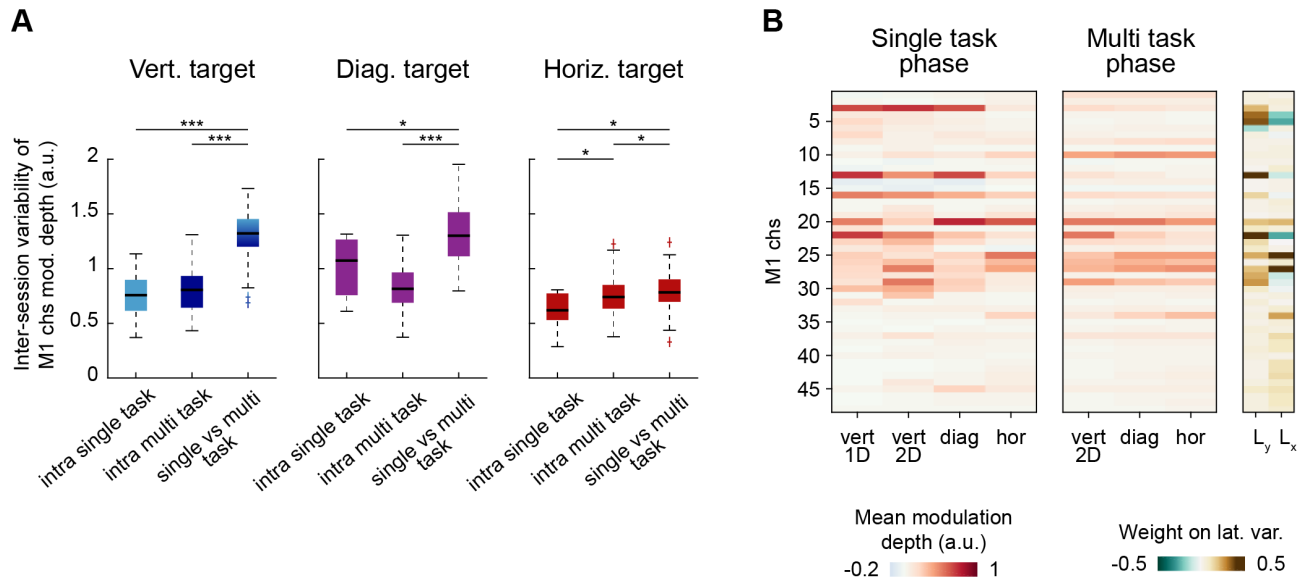

827

828

829 **Figure 3 | Neural tuning strategies.** **A** Inter-session variability of M1 channels modulation depth within and between  
 830 the two phases of the experimental protocol (i.e., single task and multi task phases) for each target type. For the vertical  
 831 target, only the first 10 sessions with 1D control were considered in the single task phase, while session 11 with 2D  
 832 control was excluded. **B** Normalized modulation depth of M1 channels, averaged over all trials of each protocol phase  
 833 with the same target. The contribution weights of M1 channels on the two latent variables L<sub>x</sub> and L<sub>y</sub> are shown on the  
 834 right. \* p < 0.05, \*\* p < 0.01, \*\*\* p < 0.001, Wilcoxon rank-sum test.

835

836

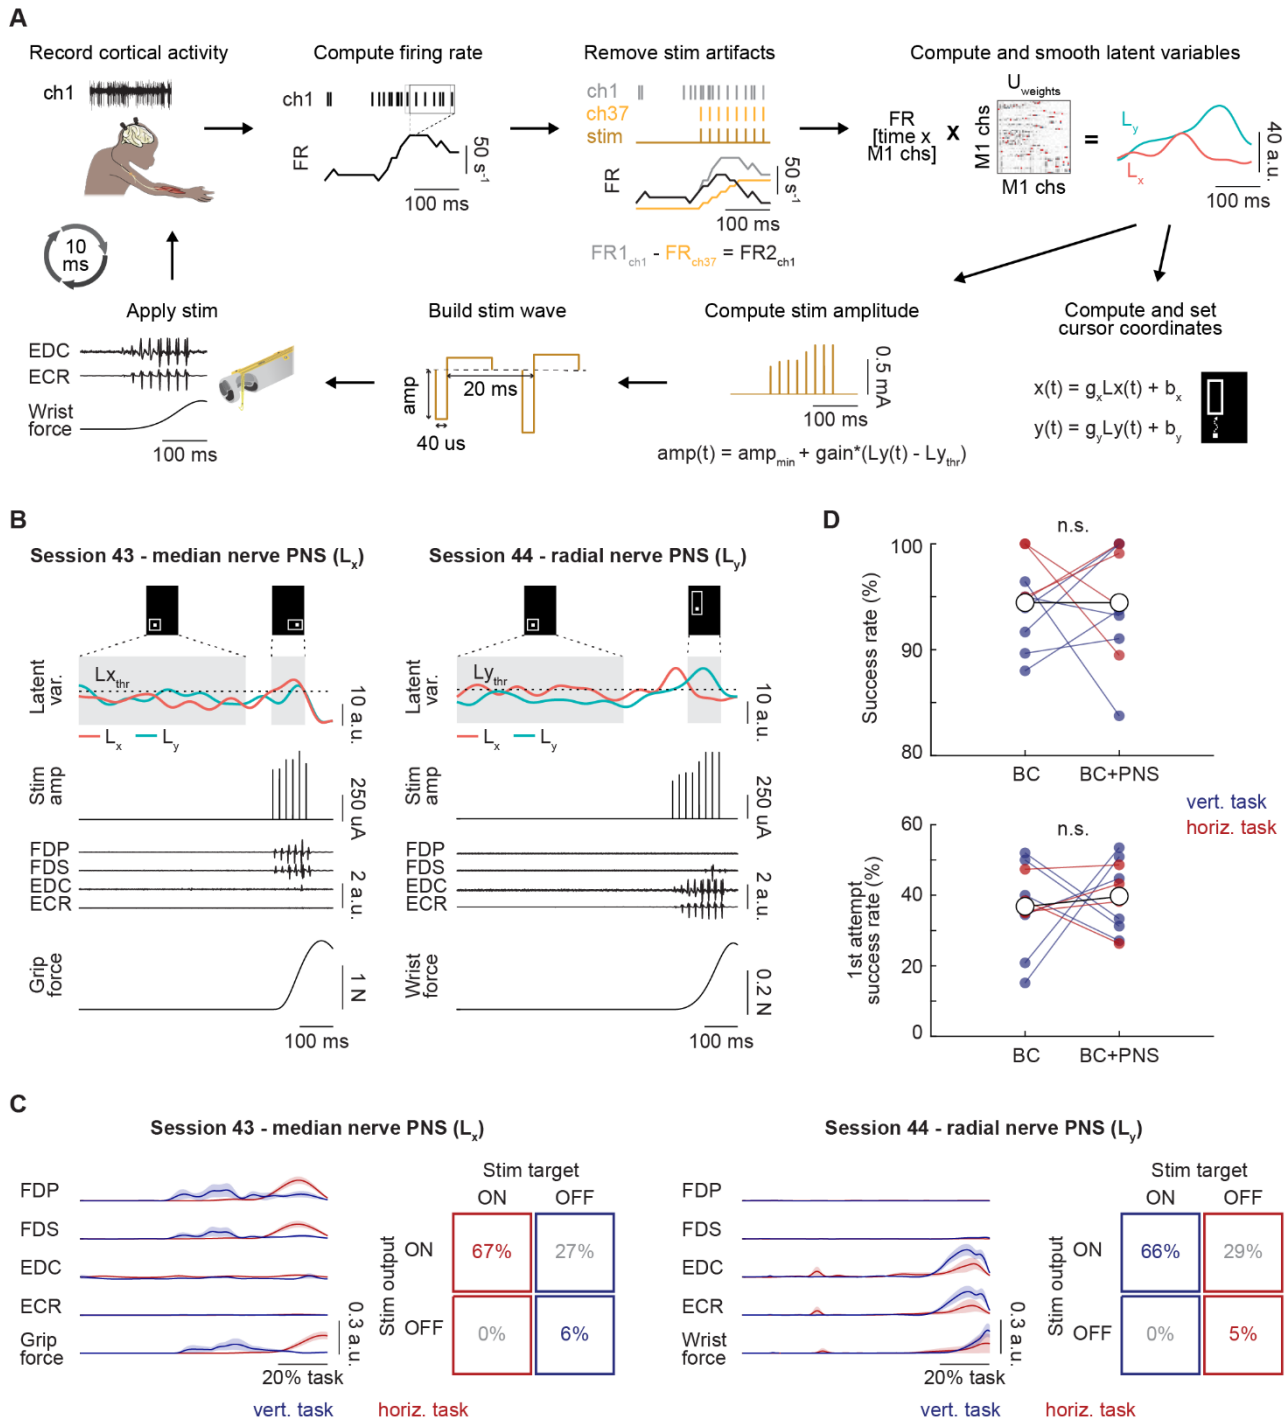

837

838

839 **Figure 4 | Methods and performance of manifold-based BBI.** **A** Procedure for brain PNS control. M1 cortical activity is recorded. The firing rate of each M1 channel is computed as the number of spikes in overlapping bins of 100 ms with a sliding window of 10 ms. Stimulation artifacts are removed by subtracting the firing rate of a reference M1 channel (ch37), found to respond only when stimulation was applied. The latent variables  $L_x$  and  $L_y$  are computed by multiplying the firing rate of the 48 M1 channels per the  $U_{weights}$  matrix. After being smoothed,  $L_x$  and  $L_y$  are linearly transformed to set the cursor x and y coordinates. The leading latent variables of the session are also linearly mapped to the amplitude of PNS (in the example, only  $L_y$  is driving stimulation). The stimulation wave is built as a train of biphasic pulses (pulse-width of 40  $\mu$ s, frequency of 50 Hz). Stimulation is then applied from the preselected channel (in the example of the radial Mk-TIME) thus recruiting hand muscles and generating force. The overall decoding procedure induces a time delay of approximately 10 ms. **B** Representative successful trials of brain PNS control on two sessions in which median or radial nerve stimulation was enabled, respectively. The monkey performed the brain cursor control task while the latent variables

850 controlled both the movement of the cursor and the amplitude of PNS. On session 43,  $L_x$  was linearly mapped to median  
851 nerve stimulation to recruit flexor muscles and close the hand. On session 44,  $L_y$  was linearly mapped to radial nerve  
852 stimulation to recruit extensor muscles and open the hand. Stimulation was enabled only after succeeding in the baseline  
853 phase of the cursor control task and activated when the leading latent variable exceeded the threshold. **C** Quantification  
854 of the target specificity of the BBI on session 43 (only median nerve stimulation enabled, controlled by  $L_x$ ) and on session  
855 44 (only radial nerve stimulation enabled, controlled by  $L_y$ ). Left for each session: hand muscle activity and force,  
856 generated by stimulation, averaged across all successful trials with the same target type (vertical and horizontal). Right  
857 for each session: confusion matrices showing the percentage of successful trials in which stimulation was activated or  
858 kept off as desired or not (i.e., median nerve stimulation, which was controlled by  $L_x$ , should ideally have been delivered  
859 for the horizontal target and kept off for the vertical target, whereas radial nerve stimulation, which was controlled by  $L_y$ ,  
860 should ideally have been delivered for the vertical target and kept off for the horizontal target). **D** Comparison of success  
861 rate in the brain cursor control task when PNS was or was not enabled ( $n = 10$ , 6 sessions). Data referring to the same  
862 session and the same target type (vertical or horizontal) were pairwise compared. On the 6 sessions, median nerve  
863 stimulation was modulated by  $L_x$ , whereas radial nerve stimulation was modulated by  $L_y$ . Except on the first session,  
864 only one type of stimulation was enabled at a time (**Supp. Table 2**). n.s. = not significant ( $p > 0.05$ , Wilcoxon signed-rank  
865 test). Abbreviations: flexor digitorum profundus (FDP), flexor digitorum superficialis (FDS), extensor digitorum  
866 communis (EDC), extensor carpi radialis (ECR).

867

868 **Supplementary Figures**

869

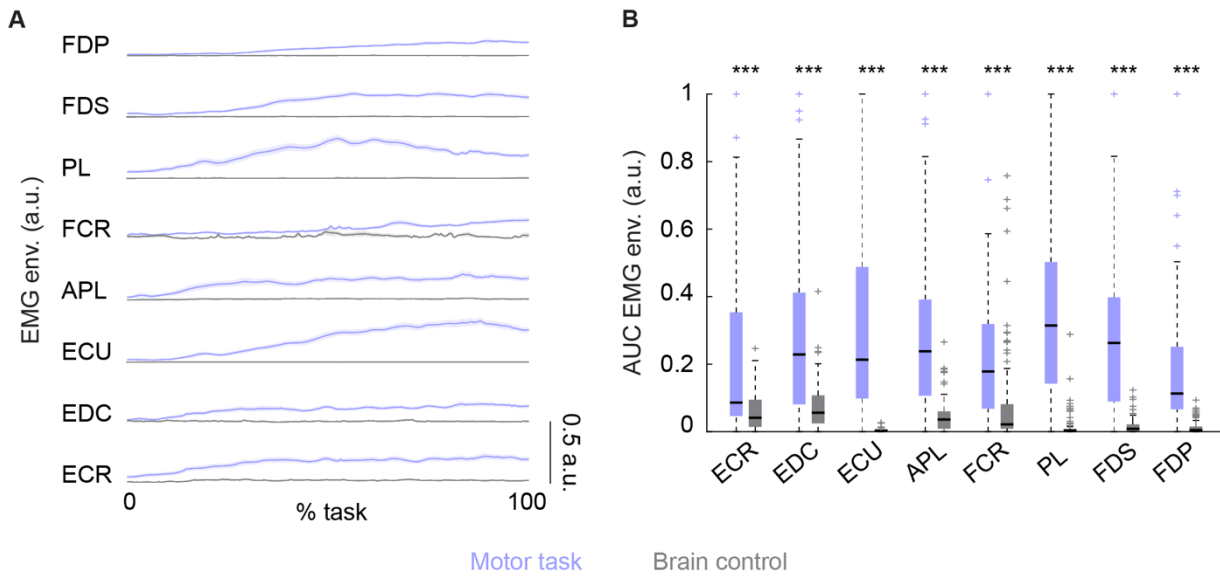

870

871

872 **Supplementary figure 1 | Hand muscles activity during manifold-based BMI and hand motor tasks.** **A** Average  
873 dynamics of the EMG envelope of hand muscles in comparison between reach-and-grasp trials and brain cursor control  
874 trials (session 39). **B** Area under the curve (AUC) of the EMG envelope for the different muscles in comparison between  
875 reach-and-grasp trials and brain cursor control trials (sessions 39 and 43). \*\*\*  $p < 0.001$ , Wilcoxon rank-sum test.  
876 Abbreviations: flexor digitorum profundus (FDP), flexor digitorum superficialis (FDS), palmaris longus (PL), flexor carpi  
877 radialis (FCR), abductor pollicis longus (APL), extensor carpi ulnaris (ECU), extensor digitorum communis (EDC),  
878 extensor carpi radialis (ECR).



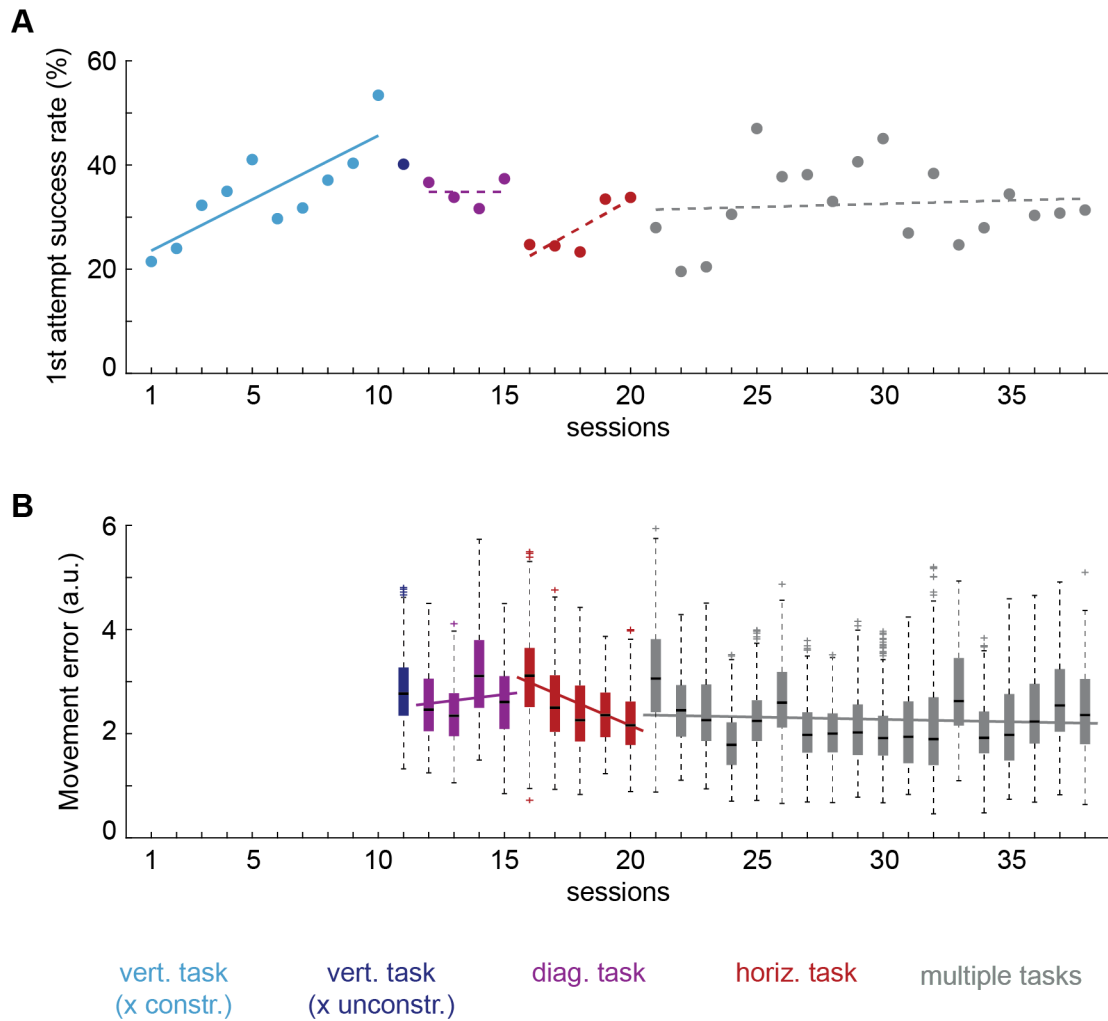

879

880

881 **Supplementary figure 2 | Additional performance measures of manifold-based BMI. A** Percentage of 1<sup>st</sup> attempt  
882 successes (i.e., the monkey holds the cursor in the baseline and target boxes for the required periods on the first time the  
883 cursor entered each box) over sessions. **B** Movement error (i.e., deviation of the cursor path from the ideal straight  
884 trajectory connecting the centers of the baseline and target boxes) of successful trials over sessions, after outliers removal.  
885 For the 1 DoF configuration of the first 10 sessions, the movement error could not be computed. In the two panels, the  
886 different colors indicate the different types of task performed by the animal throughout the protocol. Linear regression  
887 models were fitted to the data over the sessions with the same task (full line when significant, i.e.,  $p < 0.05$ , F-test, dashed  
888 line otherwise).

889

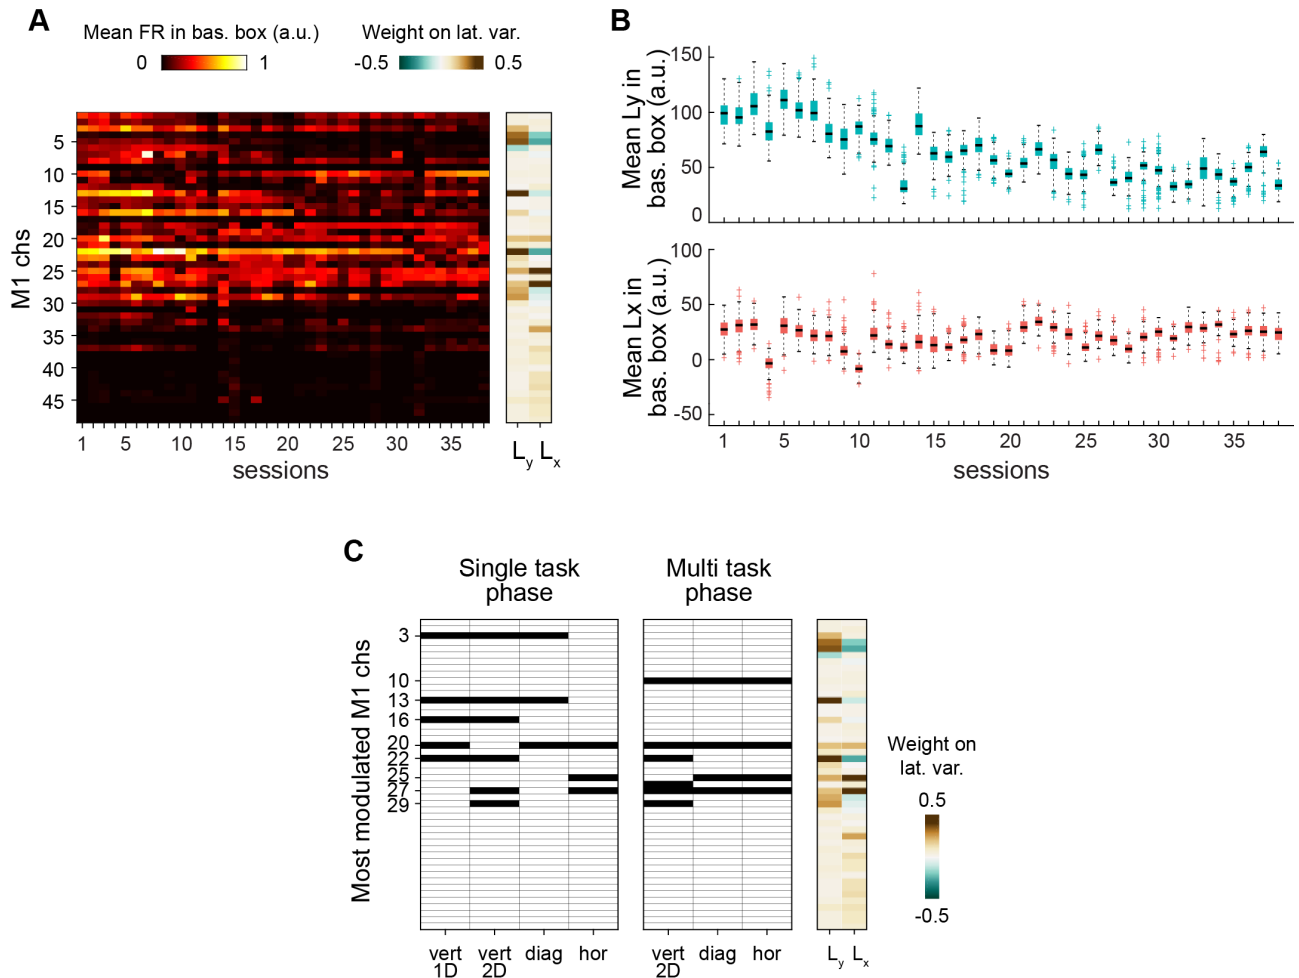

890

891

892 **Supplementary figure 3 | Changes in neural recordings and tuning across sessions.** **A** Mean firing rate of M1 channels  
 893 during the baseline phase of the cursor control task (i.e., when the cursor was in the baseline box) across sessions. The  
 894 contribution weights of M1 channels on the two latent variables  $L_x$  and  $L_y$  are shown on the right. **B** Mean latent variables  
 895  $L_x$  and  $L_y$  during the baseline phase of the cursor control task across sessions. **C** Most modulated M1 channels (see Supp.  
 896 Methods) for each target in the two protocol phases (i.e., single task and multi task phases), marked in black. The  
 897 contribution weights of M1 channels on the two latent variables  $L_x$  and  $L_y$  are shown on the right.

898

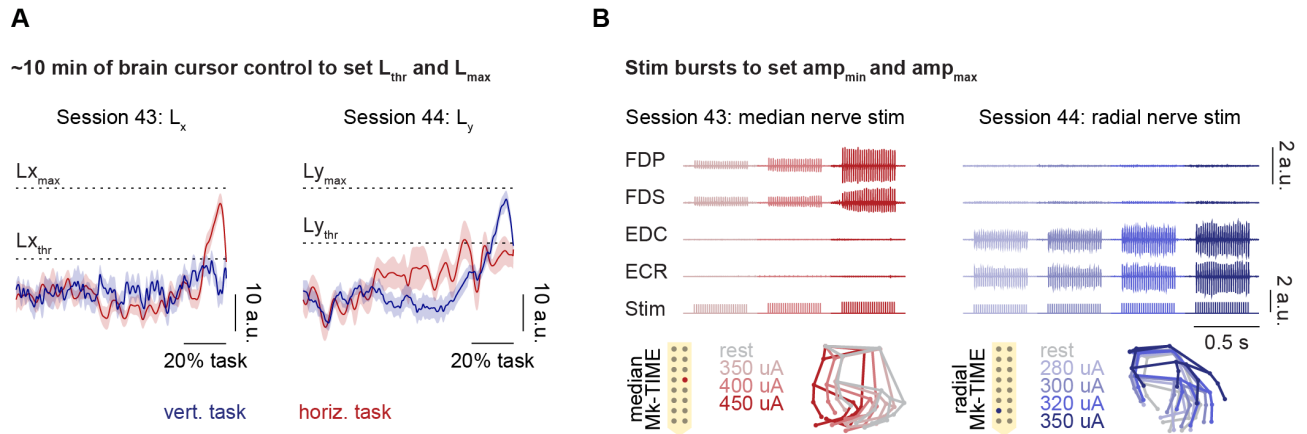

899

900

901

902 **Supplementary figure 4 | Calibration of the parameters for brain PNS control.** A First, the animal performs the brain  
 903 cursor control task for ~10 min, alternating between vertical and horizontal targets.  $L_{thr}$  and  $L_{max}$  are set based on the  
 904 activation of the leading latent variable/s of successful trials with the two target types (see Supplementary Methods). Two  
 905 sessions are shown: session 43 (only  $L_x$  controlled PNS) and session 44 (only  $L_y$  controlled PNS). B Second, stimulation  
 906 bursts are applied from the preselected channel of the median and/or the radial nerve with increasing amplitude values.  
 907  $amp_{min}$  and  $amp_{max}$  are set based on the motor response (see Supplementary Methods). The same two sessions as before  
 908 are shown: session 43 (the monkey brain-controlled PNS applied from a channel of the median Mk-TIME that evoked  
 909 hand closing) and session 44 (the monkey brain-controlled PNS applied from a channel of the radial Mk-TIME that  
 910 evoked hand opening).

911

912 **Supplementary Tables**

913

914 **Supplementary Table 1** Start and end dates of each experiment and surgery.

| <b>Experiment/surgery</b>         | <b>Start date</b> | <b>End date</b> |
|-----------------------------------|-------------------|-----------------|
| Intracortical arrays implantation | 20190605          | 20190605        |
| Reach-and-grasp task              | 20190812          | 20190812        |
| BMI, vertical target, 1 DoF       | 20190910          | 20190927        |
| BMI, vertical target, 2 DoF       | 20190930          | 20190930        |
| BMI, diagonal target, 2 DoF       | 20191001          | 20191015        |
| BMI, horizontal target, 2 DoF     | 20191017          | 20191023        |
| BMI, target alternation, 2 DoF    | 20191029          | 20191203        |
| Mk-TIMEs and EMGs implantation    | 20191204          | 20191204        |
| BBI                               | 20191217          | 20200104        |

915

916

917

918

919

920 **Supplementary Table 2** Type of stimulation enabled for the two target types on the 6 sessions of brain PNS control.  
 921 Abbreviations: enabled (EN), disabled (DIS), target not presented (-).

|                   | <b>Median PNS</b> |                    | <b>Radial PNS</b> |                    |
|-------------------|-------------------|--------------------|-------------------|--------------------|
|                   | Vertical targets  | Horizontal targets | Vertical targets  | Horizontal targets |
| <b>Session 39</b> | EN                | EN                 | EN                | EN                 |
| <b>Session 40</b> | DIS               | EN                 | EN                | DIS                |
| <b>Session 41</b> | DIS               | -                  | EN                | -                  |
| <b>Session 42</b> | DIS               | -                  | EN                | -                  |
| <b>Session 43</b> | EN                | EN                 | DIS               | DIS                |
| <b>Session 44</b> | DIS               | DIS                | EN                | EN                 |

922
